# Supplementary material
Source: publisher figshare collection journal article supplement (https://frontiersin.figshare.com/ndownloader/files/22448165)
Supplement: Supplementary file 1 [file 22448165]

## Sheet: host list
SUPPLEMENTARY TABLE 1: LIST OF KEY FOREST GENERA
Genus	Family	common name
Abies	Pinaceae	fir
Acacia	Fabaceae	wattle
Acer	Sapindaceae	maple
Agathis	Araucariaceae	kauri
Allocasuariina	Casuarinaceae	she-oak
Angophora	Myrtaceae	apple/eucalypt
Araucaria	Araucariaceae	pine
Betula	Betulaceae	birch
Brachychiton	Malvaceae	kurrajong/bottletree
Callitris	Cupressaceae	callitris
Cassia	Fabaceae	cassia
Castanospermum	Fabacae	moreton bay chestnut
Casuarina	Casuarinaceae	she-oak
Cedrela	Meliaceae	mahognay
Cedrus	Pinaceae	cedar
Celtis	Cannabaceae	hackberry
Cinnamomum	Lauraceae	camphor laurel
Corymbia	Myrtaceae	spotted gum, bloodwood,
Cryptocarya	Lauraceae	laurel
Cupaniopsis	Sapindaceae	tuckeroo
Cupressus	Cupressaceae	cypress
Delonix	Fabaceae	poinciana
Dysoxylum	Meliaceae	rosewood
Elaeocarpus	Eleocarpaceae	quandong
Eucalyptus	Myrtaceae	eucalypt
Flindersia	Rutaceae	ash, maple
Fraxinus	Oleaceae	ash
Gmelina	Lamiaceae	white beech
Grevillea robusta	Proteaceae	silky oak
Harpulia	Sapindaceae	tulipwood
Jacaranda	Bignoniaceae	jacaranda
Juniperus	Cupressaceae	juniper
Khaya	Meliaceae	African Mahogany
Liquidambar	Altingiaceae	sweetgum
Lophostemon	Myrtaceae	brush box
Melia	Meliaceae	white cedar
Melicope	Rutaceae	doughwood
Nothofagus	Nothofagaceae	southern beech
Paulownia	Paulowniceae	paulownia
Picea	Pinaceae	spruce
Pinus	Pinaceae	pine
Platanus	Platanaceae	plane tree
Plumeria	Apocynaceae	frangipanni
Podocarpus	Podocarpaceae	plum pine
Populus	Salicaceae	poplar, aspen, cottonwood
Pseudotsuga	Pinaceae	douglas fir
Quercus	Fagaceae	oak
Rhodosphaera	Anacardiaceae	deep yellowwood
Salix	Salicaceae	willow
Schinus	Anacardiaceae	pepper tree
Sequoia	Cupressaceae	redwood
Swietenia	Meliaceae	mahogany
Syncarpia	Myrtaceae	turpentine tree
Syzygium	Myrtaceae	lillypilly
Tectona	Lamiaceae	teak
Terminalia	Combretaceae	tropical almond
Thuja	Cupressaceae	cypress
Toona	Meliaceae	red cedar
Ulmus	Ulmaceae	elms

## Sheet: pest list
SUPPLEMENTARY TABLE 2: LIST OF NON-NATIVE FOREST PESTS ESTABLISHED IN AUSTRALIA
Species	Authority	Order (Phylum)	Family (Order)	Common name	Forest host genera	Host range narrow (1)/moderate (2)/very broad (3)	Year detected	First Australian state record	impact (1-3) in forestry	primary foresty (0=no, 1=yes)	states present	native region	invaded regions#	order (I will delete once finalised)
Abgrallaspis cyanophylli	(Signoret 1869)	Hemiptera	Diaspididae	cyanophyllum scale	Acacia, Castanospermum, Lophostemon, Plumeria,	3	1912	Qld	1	0	Qld, NSW, Tas, SA, WA	S.America	NZ, Eu, NA, As	1
Aceria fraxiniflora	(Nalepa 1909)	Acari	Eriophyidae	ash flower galling mite	Fraxinus	1	1999	NSW	1	1	NSW	N.America	Eu	2
Adelges cooleyi	(Gillette 1907)	Hemiptera	Adelgidae	Cooley spruce aphid	Pseudotsuga	1	1996	NSW	1	1	NSW, Vic	N.America	Eu	3
Adelges nordmannianae (sensu lato)	(Eckstein 1890)	Hemiptera	Adelgidae	Silver fir Adelgid	Abies, Picea	1	1963	Tas	1	1	Vic, Tas	Asia	NZ, Eu	4
Aleurodicus destructor	(Mackie 1912)	Hemiptera	Aleyrodidae	coconut whitefly	Acacia, Syzygium, Eucalyptus	3	1927	Qld	1	0	Qld, NSW, Vic, WA, NT	Pacific	SA	5
Aleurodicus dispersus	Russell 1965	Hemiptera	Aleyrodidae	spiralling whitefly	Acacia, Plumeria, Terminalia, Cinnamomum, Celtis	3	1998	Qld	1	0	Qld	S.America	Eu, Af, As	6
Amauronematus viduatus	(Zetterstedt 1838)	Hymenoptera	Tenthridinidae	willow sawfly	Salix	1	1992	NSW	1	1	NSW	Europe	NZ	7
Anobium punctatum	(deGeer 1774)	Coleoptera	Ptinidae	common house borer	Timber; Abies, Araucaria, Salix, Pinus, Eucalyptus	2	1902	NSW	2	1	Qld, NSW, Vic, Tas, SA, WA	Europe	NZ	8
Aonidiella aurantii	(Maskell 1879)	Hemiptera	Diaspididae	California red scale	Eleocarpus, Pinus, Plumeria, Salix	3	1896	NSW	1	0	Qld, NSW, Vic, Tas, SA, WA, NT	Asia	NZ, Eu, Af, NA, SA	9
Aonidiella inornata	McKenzie 1938	Hemiptera	Diaspididae	papaya red scale	Acacia, Plumeria, Casuarina, Cassia	3	1953	Qld	1	0	Qld, WA, NT	Asia	NA	10
Aonidiella orientalis	(Newstead 1894)	Hemiptera	Diaspididae	oriental scale	Plumeria, Salix, Terminalia, Ulmus, Populus, Salix, Podocarpus, Celtis, Syzygium, Eucalyptus	3	1915	NT	1	0	Qld, WA, NT	Asia	Af, NA, SA	11
Aphis craccivora	Koch & C.L. 1854	Hemiptera	Aphididae	cowpea aphid	Acacia, Eucalytpus, Salix	3	1920	NSW	1	0	Qld, NSW, Vic, Tas, SA, WA, NT	Eurasia	NZ, Af, NA, SA	12
Aphis gossypii	Glover 1877	Hemiptera	Aphididae	melon aphid	Acacia, Cassia, Lophostempon, Plumeria, Eucalyptus	3	1902	NSW	1	0	Qld, NSW, Vic, Tas, SA, WA, NT	unknown	NZ, Eu, Af, NA, SA, As	13
Arhopalus rusticus	(Linnè 1758)	Coleoptera	Cerambycidae	longicorn beetle	Pinus	2	2000	Vic	1	1	NSW, Vic	Europe		14
Arhopalus syriacus	(Reitter 1895)	Coleoptera	Cerambycidae	longicorn beetle	Pinus, Acacia	1	1958	NSW	1	1	Qld, NSW	Europe		15
Aspidiotus destructor	Signoret 1869	Hemiptera	Diaspididae	coconut scale	Plumeria, Syzygium, Terminalia	3	1948	Qld	1	0	Qld, NSW, Vic, WA, NT	Asia	Eu, Af, NA, SA	16
Aspidiotus nerii	Bouchè 1833	Hemiptera	Diaspididae	oleander scale	Acacia, Allocasuarina, Araucaria, Cassia, Castanospermum, Casuarina, Cedrus, Cupressus, Dysoxylon, Eleocarpus, Flindersia, Rhodosphaera, Toona, Swietenia Eucalyptus	3	1896	NSW	1	0	Qld, NSW, Vic, Tas, SA, WA, NT	Europe	NZ, Af, NA, SA, As	17
Asterodiaspis variolosa	(Ratzeburg 1870)	Hemiptera	Asterolecaniidae	Golden oak scale	Quercus	1	1915	Tas	1	1	NSW, Vic, Tas, SA, WA	Europe	NZ, Af, NA, SA, As	18
Atrichonotus taeniatulus	Berg 1881	Coleoptera	Curculionidae	Small lucerne weevil	Eucalyptus	3	1938	NSW	1	0	NSW, Vic, WA	S.America	NZ, NA, SA	19
Brevipalpus californicus	(Banks 1904)	Acari	Tenuipalpidae	omnivorous mite	Plumeria, Acacia, Acer, Cupressus, Jacaranda, Liquidambar, Podocarpus	3	1934	NSW	1	0	NSW, Vic, Tas, SA, WA, NT	unknown	Eu, Af, NA, SA, As	20
Brevipalpus phoenicis	(Geijskes 1939)	Acari	Tenuipalpidae	false spider mite	Eucalyptus, Khaya, Cupaniospsis, Cryptocaria	3	1984	NSW	1	0	Qld, NSW, Vic, SA, WA, NT	unknown	NZ, Eu, Af, NA, SA, As	21
Bryobia rubrioculus	(Scheuten 1857)	Acari	Tetranychidae	brown mite	Callitris, Ulmus, Populus	3	1994	NSW	1	0	Qld, NSW, Vic, Tas, SA, WA	unknown	NZ, Eu, Af, NA, SA, As	22
Buprestis novemmaculata	Linneaus 1767	Coleoptera	Buprestidae	jewel beetle	Abies, Picea, Pinus	1	1970	WA	1	1	WA	Europe	NZ, Af, SA, As	23
Calaphis flava	Mordvilko 1928	Hemiptera	Aphididae	yellow dark veined birch aphid	Betula	1	1948	TAS	1	1	Vic, Tas	Europe	Af, NA	24
Carulaspis juniperi	(Bouchè 1851)	Hemiptera	Diaspididae	juniper scale	Cupressus	2	1962	TAS	1	1	Tas	Europe	NZ, NA, SA	25
Cavariella aegopodii	(Scopoli 1763)	Hemiptera	Aphididae	Willow-carrot aphid	Salix	3	1928	NSW	1	0	Qld, NSW, Vic, Tas, SA, WA	Europe	NZ, SA, As	26
Ceroplastes floridensis	Comstock 1881	Hemiptera	Coccidae	Florida wax scale	Pinus, Eleocarpus	3	1909	Qld	1	0	Qld, NSW	unknown	Eu, NA, As	27
Ceroplastes rubens	Maskell 1893	Hemiptera	Coccidae	Pink wax scale	Pinus, Plumeria, Syzygium, Ulmus, Corymbia	3	1901	Qld	1	0	Qld, NSW, Vic, SA, WA, NT	Africa	Eu, NA, As	28
Ceroplastes sinensis	Del Guercio 1900	Hemiptera	Coccidae	chinese wax scale	Abies, Jacaranda, Platanus, Schinus, Eucalyptus	3	1967	NSW	1	0	Qld, NSW, Vic, SA, WA, NT	Asia	NZ, Eu	29
Chaitophorus leucomelas	Koch & C.L. 1854	Hemiptera	Aphididae	Black poplar leaf aphid	Populus	1	2011	NSW	1	1	NSW	Eurasia	Af, NA, SA	30
Chrysomphalus dictyospermi	(Morgan 1889)	Hemiptera	Diaspididae	dictyospermum scale	Acacia, Brachychiton, Schinus, Plumeria, Syzygium, Pinus, Platanus, Casuarina, Terminalia, Cupressus, Thuja, Populus, Salix, Cinnamomum	3	1912	Qld	1	0	Qld, NSW, SA, NT	Asia	Eu, Af, NA, SA	31
Chrysomphalus pinnulifer	(Maskell 1891)	Hemiptera	Diaspididae	amoured scale	Lophostemon, Syzygium, Sequioa, Agonis, Grevillea robusta, Cinnamomum, Salix	3	1955	Qld	1	0	Qld, NSW, WA	Asia	Eu, Af, SA	32
Cinara costata	(Zetterstedt 1878)	Hemiptera	Aphididae	mealy spruce aphid	Cupressus, Picea, Pinus	1	1952	TAS	1	1	Vic, Tas	Europe	Eu, NA, As	33
Cinara cupressi	(Buckton 1881)	Hemiptera	Aphididae	Cypress pine aphid	Callitris, Cupressus	1	1921	NSW	1	1	NSW, Vic	N.America	Eu, Af, SA, As	34
Cinara fresai	Blanchard & Everard Eel 1939	Hemiptera	Aphididae	Cypress aphid	Cupressus, Juniperus	1	1941	NSW	1	1	NSW, Vic, Tas, SA, WA	N.America	NZ, Eu, SA	35
Cinara juniperi	(de Geer 1773)	Hemiptera	Aphididae	Juniper aphid	Cupressus, Callitrus, Pinus	1	1948	Tas	1	1	NSW, Tas	Europe	NZ, NA, As	36
Cinara pilicornis	(Hartig 1841)	Hemiptera	Aphididae	Spruce shoot aphid	Picea	1	2008	Vic	1	1	Vic	Europe	NZ, NA, SA, As	37
Cinara tujafilina	(Del Guercio 1909)	Hemiptera	Aphididae	Thuja aphid	Callitris	1	1900	NSW	1	1	Qld, NSW, Vic, Tas, SA	Europe	NZ, Af, SA, As	38
Clavaspis herculeana	(Cockerell & Hadden 1909)	Hemiptera	Diaspididae	cassia bark scale	Cedrela, Swietenia, Populus, Cinnamomum, Acacia, Cassia, Grevillea robusta	3	1938	Qld	1	0	Qld, NSW	S.America	Af, NA, As	39
Coccus hesperidum	(Linneus 1758)	Hemiptera	Coccidae	Soft brown scale	Eucalytpus, Sygzygium, Picea, Pinus	3	1923	NSW	1	0	Qld, NSW, Vic, SA, WA, NT	Europe	NZ, Af, NA, SA, As	40
Coccus longulus	(Douglas 1887)	Hemiptera	Coccidae	long brown scale	Acacia, Pinus	3	1899	NSW	1	0	Qld, NSW, Vic, SA, WA, NT	Pacific	NZ, Eu, Af, NA, SA	41
Coccus viridis	(Green 1889)	Hemiptera	Coccidae	green coffee scale	Terminalia, Podocarpus, Plumeria, Cassia, Melia, Eucalyptus, Syzygium	3	1948	Qld	1	0	Qld, NSW, WA, NT	S.America or Africa	Eu, NA, As	42
Corythucha ciliata	(Say 1832)	Hemiptera	Tingidae	Sycamore lace bug	Platanus	1	2006	NSW	2	1	NSW, Vic	N.America	Eu, SA, As	43
Diaspidiotus ancylus	(Putnam 1878)	Hemiptera	Diaspididae	putnam scale	Casuarina, Quercus, Ulmus, Acer, Acacia	3	1939	Qld	1	0	Qld, NSW	N.America	NZ, Af, SA	44
Diaspidiotus ostreaeformis	(Curtis 1843)	Hemiptera	Diaspididae	oystershell scale	Acacia, Betula, Quercus, Platanus, Abies, Acer, Fraxinus, Ulmus	3	1948	SA	1	0	NSW, Vic, Tas, SA	Europe	NZ, NA, SA, As	45
Diaspidiotus perniciosus	(Comstock 1881)	Hemiptera	Diaspididae	San Jose scale	Eucalyptus, Salix, Betula, Acacia, Quercus, Fraxinus, Acer, Ulmus,	3	1900	NSW	1	0	Qld, NSW, Vic, Tas, SA, WA	Asia	NZ, Eu, Af, NA, SA	46
Dinoderus minutus	(Fabricius 1775)	Coleoptera	Bostrichidae	ghoon borer	Timber; Cupressus, Salix	2	1915	NSW	2	1	Qld, NSW, Vic, Tas, SA, WA, NT	Asia	NZ, Eu, Af, NA, SA	47
Discochiton expansum	(Green 1896)	Hemiptera	Coccidae		Cryptocaria, Eucalyptus	3	1916	NSW	1	0	Qld, NSW	Asia		48
Drepanosiphum platanoidis	(Schrank 1801)	Hemiptera	Aphididae	Sycamore aphid	Acer	1	1948	Tas	1	1	Vic, Tas	Europe	NZ, Af, NA, As	49
Duplaspidiotus claviger	(Cockerell 1901)	Hemiptera	Diaspididae	camellia mining scale	Brachychiton, Syzygium	3	1937	Qld	1	0	Qld, NSW	Asia	Af, NA	50
Dysaphis aucupariae	(Buckton 1879)	Hemiptera	Aphididae	Wild service aphid	Salix	2	1981	NSW	1	0	Qld, NSW, Vic, Tas, WA	Europe	NZ, NA, SA	51
Elatobium abietinum	(Walker & F. 1849)	Hemiptera	Aphididae	Spruce aphid	Picea	1	1952	Tas	1	1	Vic, Tas	Europe	NZ, NA, SA	52
Eriosoma lanuginosum	(Hartig 1839)	Hemiptera	Aphididae	Elm balloon-gall aphid	Ulmus	1	1948	NSW	1	1	NSW, Vic, Tas	Europe	NZ, SA	53
Eriosoma pyricola	Baker & Davidson 1916	Hemiptera	Aphididae	woolly pear aphid	Ulmus	2	1934	NSW	1	0	NSW, Vic	Europe	NZ, NA, SA	54
Ernobius mollis	(Linneaus 1758)	Coleoptera	Anobiidae	Pine bark anobiid	Pinus, Pseudotsuga, Araucaria, Eucalyptus	2	1928	NSW	1	1	Qld, NSW, Vic, Tas, SA, WA	Europe	NZ, NA	55
Essigella californica	(Essig 1909)	Hemiptera	Aphididae	Monterey pine aphid	Pinus	1	1998	NSW	3	1	Qld, NSW, Vic, Tas, SA, WA	N.America	NZ, Eu, SA	56
Eucalymnatus tessellatus	(Signoret 1873)	Hemiptera	Coccidae	palm scale	Cinnamomum, Sequoia, Plumeria, Corymbia, Eugenia, Syzygium,	3	1896	NSW	1	0	Qld, NSW, SA, NT	S.America	Eu, Af, NA, As	57
Euceraphis betulae	(Koch & C.L. 1855)	Hemiptera	Aphididae	Birch aphid	Betula	1	1960	Tas	1	1	Vic, Tas	Europe	NZ, NA	58
Euceraphis punctipennis	(Zetterstedt 1828)	Hemiptera	Aphididae	downy birch aphid	Betula	1	1954	TAS	1	1	Tas	Europe	NZ, NA	59
Eulachnus thunbergii	Wilson & H.F. 1919	Hemiptera	Aphididae	pine aphid	Pinus	1	1959	NSW	1	1	Qld, NSW	Asia		60
Euplatypus parallelus	(Fabricius 1801)*	Coleoptera	Curculionidae	ambrosia beetle	Araucaria, Corymbia, Eucalyptus, Brachychiton	3	1893	NSW	1	1	Qld, NSW	S.America	Af, NA, As	61
Eutetranychus orientalis	(Klein 1936)	Acari	Tetranychidae	citrus brown mite	Cassia, Toona	3	1964	Qld	1	0	Qld, WA, NT	Asia	Eu, Af	62
Fiorinia japonica	Kuwana 1902	Hemiptera	Diaspididae	Japanese pine scale	Cedrus, Pinus, Acacia	3	1915	Qld	1	1	Qld	Asia	Eu, NA	63
Helicoverpa armigera	(Hubner 1808)	Lepidoptera	Noctuidae	corn earworm	Corymbia, Pinus, Eucalyptus	3	1885	Qld	1	0	Qld, NSW, Vic, Tas, SA, WA, NT	unknown	NZ, Eu, Af, SA, As	64
Heliothrips haemorrhoidalis	(Bouche 1833)	Thysanoptera	Thripidae	greenhouse thrips	Acacia, Araucaria, Flindersia, Platanus, Plumeria, Pseudostuga, Sygygium, Ulmus, Pinus, Eucalytpus	3	1892	NSW	1	0	Qld, NSW, Vic, Tas, SA, WA, NT	S.America	NZ, Eu, Af, NA, As	65
Hemiberlesia lataniae	(Signoret 1869)	Hemiptera	Diaspididae	latania scale	Acacia, Acer, Castenospermum, Flindersia, Melia, Salix, Eucalyptus, Cinnamomum, Plumeria, Cedrela, Dysoxylum, Syzygium, Cedrus, Pinus, Grevellia robusta, Cupressus, Juniperus, Thuja, Elaeocarpus, Salix, Populus, Cassia, Quercus, Ulmus,	3	1897	Qld	1	0	Qld, NSW, Vic, WA, NT	unknown	NZ, Eu, Af, NA, SA, As	66
Hemiberlesia palmae	(Cockerell 1893)	Hemiptera	Diaspididae	tropical palm scale	Castenospermum, Plumeria, Syzygium, Cinnamomum, Ulmus	3	1980	NSW	1	0	Qld, NSW	unknown	Eu, Af, NA, SA, As	67
Hemiberlesia rapax	(Comstock 1881)	Hemiptera	Diaspididae	greedy scale	Acacia, Callitris, Lophostemon	3	1890	NSW	1	0	Qld, Vic, Tas, SA, WA, NT	Europe	NZ, Af, NA, SA, As	68
Heterobostrychus aequalis	(Waterhouse 1884)	Coleoptera	Bostrichidae	lesser auger beetle	Timber; Cupressus, Swietenia, Toona, Cassia, Cedrela, Delonix, Tectona, Terminalia	3	2013	Qld	1	1	Qld	Asia	Eu, Af, NA	69
Heteronychus arator	(Fabricius 1775)	Coleoptera	Dynastidae	African black beetle	Pinus, Eucalyptus, Cassia	3	1925	NSW	2	1	Qld, NSW, Vic, SA, WA	Africa	NZ, SA	70
Hylastes ater	Paykull 1800*	Coleoptera	Curculionidae	Black pine bark beetle	Pinus, Eucalyptus	2	1936	SA	2	1	Qld, NSW, Vic, Tas, SA, WA	Eurasia	NZ, SA	71
Hylotrupes bajulus	(Linnè 1758)	Coleoptera	Cerambycidae	European house borer	Timber; Abies, Araucaria, Pinus, Quercus	2	2004	WA	3	1	WA	Europe	Af, NA, SA, As	72
Hylurgus ligniperda	(Fabricius 1787)	Coleoptera	Curculionidae	Goldenhaired bark beetle	Pinus	1	1942	SA	2	1	Qld, NSW, Vic, Tas, SA, WA	Europe	NZ, Af, NA, SA, As	73
Hypothenemus birmanus	(Eichoff 1878)*	Coleoptera	Curculionidae	kiawe scolytid	Timber, Acacia, Casuarina, Cassia, Eucalyptus, Melia, Quercus, Swietenia	3	1983	NSW	2	1	Qld, NSW	Asia	Af, NA, SA	74
Hypothenemus eruditus	(Westwood 1836)	Coleoptera	Curculionidae	bark beetle	Pinus	1	1910	Qld	1	1	Qld, NSW	S.America	As	75
Hypothenemus seriatus	(Eichoff 1872)*	Coleoptera	Curculionidae	bark beetle	Acacia	3	1933	Qld	2	1	Qld, NSW	Asia	NA, SA	76
Icerya seychellarum	(Westwood 1855)	Hemiptera	Monophlebiidae	common white mealybug	Jacaranda, Grevillea robusta, Leptospermum, Syzygium, Plumeria, Casuarina, Pinus, Acacia, Cassia, Quercus, Cinnamomum, Tectona	3	1900	NSW	1	0	Qld, NSW, WA, NT	Asia	NZ, Eu, Af, SA	77
Ips grandicollis	(Eichoff 1868)	Coleoptera	Curculionidae	Five-spined bark beetle	Pinus	1	1943	SA	3	1	Qld, NSW, Vic, SA, WA	N.America	SA	78
Japananus hyalinus	Osborn 1900	Hemiptera	Aphididae	Japanese maple leafhopper	Acer	1	1987	NSW	1	1	NSW	Asia	Eu, NA	79
Kybos lindbergi	(Linnavuori 1951)	Hemiptera	Cicadellidae	Birch leafhopper	Betula	1	1998	NSW	1	1	NSW	Europe	NZ	80
Liothrips vaneeckei	Priesner 1920	Thysanoptera	Phlaeothripidae	lily thrips	Acacia	3	2001	Qld	1	0	Qld, Vic, SA	Europe	NZ, NA, As	81
Lyctus brunneus	(Stephens 1830)	Coleoptera	Bostrichidae	powderpost beetle	Timber; Agathis, Araucaria, Brachychiton, Corymbia, Cryptocaria, Cupressus, Gmelina, Lophostemon, Toona, Pinus, Eucalyptus	3	1899	TAS	1	1	Qld, NSW, Vic, Tas, SA, WA	S.America	NZ, Eu, Af, NA, As	82
Lyctus discedens	Blackburn 1888	Coleoptera	Bostrichidae	small powderpost beetle	Timber; Brachychiton, Corymbia, Eucalyptus	3	1892	NSW	2	1	Qld, NSW, Vic, Tas, WA	Asia		83
Maconellicoccus hirsutus	(Green 1908)	Hemiptera	Pseudococcidae	pink mealybug	Acacia, Eucalyptus, Khaya, Terminalia	3	1940	Qld	1	0	Qld, NSW, Vic, WA, NT	Asia	Eu, Af, NA	84
Macrosiphum euphorbiae	(Thomas & C. 1878)	Hemiptera	Aphididae	potato aphid	Eucalyptus, Populus, Salix	3	1920	NSW	1	0	Qld, NSW, Vic, Tas, SA, WA, NT	N.America	NZ, Eu, As	85
Marchalina hellenica	(Gennadius 1883)	Hemiptera	Margarodidae	Giant pine scale	Pinus, Cedrus, Picea, Abies	2	2014	Vic	3	1	Vic, SA	Europe		86
Milviscutulus mangiferae	(Green 1889)	Hemiptera	Coccidae	mango shield scale	Syzygium, Plumeria, Terminalia, Elaeocarpus, Cinnamomum, Melia,	3	1988	Qld	1	0	Qld, NT	Asia	Af, NA, SA	87
Minthea rugicollis	(Walker 1858)	Coleoptera	Bostrichidae	hairy powderpost beetle	Timber; Brachychiton, Corymbia	3	1924	NSW	2	1	Qld, NSW, Vic, SA, WA, NT	Asia	Af	88
Morganella longispina	(Morgan 1889)	Hemiptera	Diaspididae	maskell scale	Cedrela, Toona, Celtis, Fraxinus, Acer, Cinnamomum	3	1933	Qld	1	0	Qld	Asia	Af, NA, SA	89
Moritziella corticalis	(Kaltenbach 1867)*	Hemiptera	Phylloxeridae	Oak stem phylloxerid	Quercus, Cupressus	1	1967	Tas	1	1	NSW, Tas	Europe	NZ	90
Myzocallis castanicola	Baker & A.C. 1917	Hemiptera	Aphididae	Sweet chestnut aphid	Quercus	1	1920	NSW	1	1	Qld, NSW, Vic, Tas	N.America	NZ, Eu, SA	91
Myzus persicae	(Sulzer 1776)	Hemiptera	Aphididae	green peach aphid	Jacaranda, Salix	3	1903	NSW	1	0	Qld, NSW, Vic, Tas, SA, WA, NT	Asia	NZ, Eu, Af, NA, SA	92
Naupactus cervinus	Boheman 1840	Coleoptera	Curculionidae	Fuller's rose weevil	Eucalytpus, Acacia	3	1934	NSW	1	0	Qld, NSW, Vic, Tas, SA, WA	S.America	NZ, Eu, Af, NA, As	93
Naupactus leucoloma	Boheman 1840	Coleoptera	Curculionidae	Whitefringed weevil	Acer, Eucalyptus, Pinus	3	1929	NSW	1	0	Qld, NSW, Vic, Tas, SA, WA	S.America	NZ, Eu, Af, NA	94
Nematus oligospilus	Forster 1854	Hymenoptera	Tenthridinidae	Willow sawfly	Salix	1	2003	NSW	2	1	Qld, NSW, Vic, Tas, SA, WA	Europe	NZ, Af, SA	95
Nipaecoccus viridis	(Newstead 1894)	Hemiptera	Pseudococcidae	lebbeck mealybug	Acacia, Grevillea robusta, Casuarina, Jacaranda	3	1971	Qld	1	0	Qld, WA, NT	Asia	Eu, Af, NA, SA	96
Oligonychus punicae	(Hirst 1926)	Acari	Tetranychidae	avocado brown mite	Khaya, Syzygium, Eucalyptus	3	1983	NT	1	0	NT	Asia	NA, SA	97
Oligonychus ununguis	(Jacobi 1905)	Acari	Tetranychidae	Spruce spider mite	Piceae, Pinus	2	1940	NSW	1	1	Qld, NSW, SA, WA	Europe	NZ, Af, NA, SA, As	98
Otiorhynchus cribricollis	Gyllenhal 1834	Coleoptera	Curculionidae	Apple weevil	Pinus, Eucalyptus	3	1888	Vic	1	0	Qld, NSW, Vic, Tas, SA, WA	S.America	Eu, Af, NA, As	99
Parasaissetia nigra	(Nietner 1861)	Hemiptera	Coccidae	nigra scale	Plumeria, Syzygium, Schinus, Melia, Toona, Jacaranda, Terminalia, Melicope, Salix, Delonix, Acacia, Cassia, Cinnamomum	3	1900	Qld	1	0	Qld, NSW, Vic, SA, WA, NT	Africa	NZ, Eu, NA, SA, As	100
Parlatoria pergandii	Comstock 1881	Hemiptera	Diaspididae	black parlatoria scale	Pinus, Abies, Populus, Cinnamomum, Quercus	3	1906	Qld	1	0	Qld, NT	Asia	NZ, Eu, Af, NA, SA	101
Pemphigus bursarius	(Linneaus 1758)	Hemiptera	Aphididae	Poplar gall aphid	Populus, Other	2	1924	NSW	1	1	NSW, Vic, Tas, WA	Europe	NZ, Af, NA, SA, As	102
Periphyllus californiensis	(Shinji 1917)	Hemiptera	Aphididae	Californian maple aphid	Acer	1	1957	Tas	1	1	Qld, NSW, Vic, Tas	Asia	NZ, Eu, NA	103
Phloeosinus cupressi	Hopkins 1903*	Coleoptera	Curculionidae	Cypress bark beetle	Cupressus, Callitris	2	1947	NSW	1	1	NSW, Vic	N.America	NZ	104
Phlyctinus callosus	(Schönherr 1826)*	Coleoptera	Curculionidae	Garden weevil	Eucalyptus, Cupressus	3	1888	NSW	1	1	NSW, Vic, Tas, SA, WA	Africa	NZ	105
Phyllonorycter messaniella	(Zeller 1846)	Lepidoptera	Gracillariidae	Oak leafminer	Quercus	1	1975	NSW	1	1	NSW, SA	Europe	NZ	106
Pineus pini (sensu lato)	(Macquart 1819)*	Hemiptera	Adelgidae	Pine woolly aphid	Pinus, Cupressus	1	1920	Tas	2	1	Qld, NSW, Vic, Tas, SA, WA	Europe	NZ, Af, NA, SA, As	107
Pinnaspis buxi	(Bouchè 1851)	Hemiptera	Diaspididae	bamboo mussel scale	Acacia, Cassia, Pinus, Dysoxylum	3	1981	Qld	1	0	Qld, NSW, WA, NT	Asia	Eu, Af, NA, SA	108
Pinnaspis strachani	(Cooley 1899)	Hemiptera	Diaspididae	cotton white scale	Acacia, Brachychiton, Cassia, Casuarina, Plumeria, Terminalia, Cedrela, Melia, Salix, Delonix	3	1913	NT	1	0	Qld, NSW, WA, NT	Asia	Eu, Af, NA, SA	109
Planococcus citri	(Risso 1813)	Hemiptera	Pseudococcidae	citrus mealybug	Acacia, Cassia, Delonix, Flindersia, Jacaranda	3	1900	Qld	1	0	Qld, NSW, Vic, Tas, SA, WA, NT	Asia	NZ, Eu, Af, NA, SA	110
Planococcus minor	(Maskell 1897)	Hemiptera	Pseudococcidae	pacific mealybug	Syzygium, Plumeria, Tectona, Dysoxylum, Eucalyptus, Casuarina, Terminalia, Acacia	3	1926	Qld	1	0	Qld, NSW, Vic, SA, NT	Asia	Af, NA, SA	111
Pontania proxima	(Serville 1823)	Hymenoptera	Tenthridinidae	willow gall sawfly	Salix	1	1994	Tas	1	1	Tas	Eurasia	NZ	112
Pseudaulacaspis cockerelli	(Cooley 1897)	Hemiptera	Diaspididae	false oleander scale	Casuarina, Lophostemon, Plumeria, Liquidambar, Syzygium, Terminalia, Elaeocarpus	3	1953	Qld	1	0	Qld, NSW, Vic, NT	Asia	Eu, Af, SA	113
Pseudaulacaspis pentagona	(Targioni Tozzetti 1886)	Hemiptera	Diaspididae	mulberry scale	Casuarina, Plumeria, Populus, Schinus, Cedrela, Melia, Toona, Fraxinus, Pinus, Platanus, Celtis, Acacia, Salix, Castanea, Quercus, Ulmus	3	1898	Qld	1	0	Qld, NSW	Asia	NZ, Eu, Af, NA, SA	114
Pseudococcus longispinus	(Targioni Tozzetti 1867)	Hemiptera	Pseudococcidae	long-tailed mealybug	Platantus, Brachychiton, Melia, Plumeria, Eucalyptus, Jacaranda, Pinus, Terminalia, Acacia	3	1931	NSW	1	0	Qld, NSW, Vic, Tas, SA, WA	unknown	NZ, Eu, Af, NA, SA, As	115
Pseudococcus viburni	(Signoret 1875)	Hemiptera	Pseudococcidae	obsure mealybug	Acacia, Cassia, Pinus, Eucalyptus, Cedrus, Grevillea robusta, Salix	3	1895	NSW	1	0	Qld, NSW, Vic, SA, WA, NT	S.America	NZ, Eu, Af, NA, As	116
Psyllopsis fraxini	(Linnè 1758)	Hemiptera	Psyllidae	ash gall	Fraxinus	1	1942	Tas	1	1	Tas	Europe	NZ, NA	117
Psyllopsis fraxinicola	(Foerster 1848)	Hemiptera	Psyllidae	Ash leaf psyllid	Fraxinus	1	2003	Vic	1	1	Vic	Europe	NZ, NA	118
Pulvinaria psidii	Maskell 1893	Hemiptera	Coccidae	green shield scale	Plumeria, Syzygium, Eucalyptus, Terminalia, Salix	3	1914	NT	1	0	Qld, NSW, SA, WA, NT	unknown	NZ, Eu, Af, NA, SA, As	119
Pulvinaria urbicola	Cockerell 1893	Hemiptera	Coccidae	ubicola soft scale	Plumeria, Gmelina, Jacaranda	3	1939	Qld	1	0	Qld, NSW, WA, NT	unknown	Eu, Af, NA, SA, As	120
Rhizoecus falcifer	Künckel d'Herculais 1878	Hemiptera	Pseudococcidae	root mealybug	Casuarina, Acacia	3	1961	SA	1	0	Qld, NSW, SA	Europe	NZ, Af, NA, SA	121
Ribautiana ulmi	(Linneaus 1758)	Hemiptera	Cicadellidae	European Elm leafhopper	Ulmus	1	1986	Vic	1	1	NSW, Vic, Tas	Europe	NA	122
Saissetia coffeae	(Walker 1852)	Hemiptera	Coccidae	hemispherical scale	Plumeria, Salix, Melia, Eucalyptus, Syzygium, Schinus, Picea, Agathis, Jacaranda	3	1899	Qld	1	0	Qld, NSW, Vic, Tas, SA, WA, NT	unknown	NZ, Eu, Af, NA, SA, As	123
Saissetia miranda	(Cockerell and Parrott 1899)	Hemiptera	Coccidae	mexican black scale	Terminalia, Cinnamomum, Cedrela, Melia, Swietenia, Plumeria, Schinus	3	1922	Qld	1	0	Qld, WA, NT	Africa	Eu, NA, SA, As	124
Saissetia oleae	Olivier	Hemiptera	Coccidae	olive scale	Fraxinus, Plumeria, Tectona, Schinus,Terminalia, Acacia, Cassia	3	1902	NSW	1	0	Qld, NSW, Vic, Tas, SA, WA, NT	Africa	NZ, Eu, NA, SA, As	125
Scolytus multistriatus	(Marsham 1802)	Coleoptera	Curculionidae	European elm bark beetle	Ulmus	1	1974	Vic	1	1	NSW, Vic, SA	Europe	NZ, NA, SA	126
Shivaphis celti	Das & B.C. 1918	Hemiptera	Aphididae	Asian woolly hackberry aphid	Celtis	1	2013	NSW	1	1	NSW	Asia	NA	127
Sinomegoura citricola	van der Goot 1917	Hemiptera	Aphididae	citricola aphid	Abies, Cinnamomum, Betula, Quercus, Pinus	3	1941	Qld	1	0	Qld, NSW, Tas	Asia	NA	128
Sinoxylon anale	Lesne 1897	Coleoptera	Bostrichidae	auger beetle	Timber, Acacia, Cupressus, Terminalia, Delonix	3	1924	NSW	2	1	Qld, NSW, Tas, SA, WA, NT	Asia	NZ, NA, SA	129
Siphoninus phillyreaea	(Haliday 1835)	Hemiptera	Aleyrodidae	Ash whitefly	Fraxinus	3	1998	SA	1	1	Qld, NSW, Vic, Tas, SA, NT	Eurasia	NZ, Af, NA, SA	130
Sirex noctilio	Fabricius 1773	Hymenoptera	Siricidae	Sirex wood wasp	Pinus	1	1951	Tas	3	1	Qld, NSW, Vic, Tas, SA	Eurasia	NZ, Af, NA, SA	131
Tetranychus urticae	Koch 1836	Acari	Tetranychidae	twospotted spider mite	Abies, Picea, Fraxinus, Eucalyptus	3	1906	NSW	1	0	Qld, NSW, Vic, Tas, SA, WA, NT	Europe	NZ, Af, NA, SA, As	132
Tinocallis ulmiparvifoliae	(Matsumara 1919)	Hemiptera	Aphididae	Japanese elm aphid	Ulmus	1	1920	NSW	1	1	NSW, WA	Asia	NZ, Eu, NA	133
Tremex fuscicornis	(Fabricius 1787)	Hymenoptera	Siricidae	Tremex wasp	Salix, Populus	3	1996	NSW	1	1	NSW	Eurasia	SA	134
Tuberculatus annulatus	(Hartig 1841)	Hemiptera	Aphididae	Common oak aphid	Quercus	1	1938	NSW	1	1	Qld, NSW, Vic, WA	Europe	NZ, NA, SA	135
Tuberolachnus salignus	(Gmelin 1790)	Hemiptera	Aphididae	Giant willow aphid	Salix	1	2010	NSW	1	1	NSW, Vic, Tas	Asia	NZ, Eu, Af, NA, SA	136
Xanthogaleruca luteola	(Müller 1766)	Coleoptera	Chrysomelidae	Elm leaf beetle	Ulmus	1	1982	Vic	3	1	NSW, Vic, Tas	Europe	Af, NA, SA, As	137
Xyleborinus saxesenii	Ratzeburg 1837	Coleoptera	Curculionidae	Fruit tree pinhole borer	Pinus, Eucalyptus, Araucaria, Corymbia	3	1936	Qld	1	0	Qld, NSW, Vic, WA	Eurasia	NZ, Af, NA, SA	138
Xyleborus affinis	Eichoff 1867*	Coleoptera	Curculionidae	sugarcane shot hole borer	Eucalyptus, Acacia, Araucaria, Pinus	3	1974	Qld	1	0	Qld, NSW	N.America	SA, As	139
Xyleborus ferrugineus	Fabricius 1801	Coleoptera	Curculionidae	Black twig borer	Araucaria, Pinus, Syzygium,	3	1929	NSW	1	1	Qld, NSW	Asia	Eu, Af, NA, SA	140
Xyleborus perforans	(Wollaston)	Coleoptera	Curculionidae	Island pinhole borer	Eucalyptus, Pinus, Flindersia, Syzygium, Eleocarpus, Corymbia, Castenospermum, Brachychiton, Araucaria, Acer, Acacia	3	1891	Qld	1	1	Qld, NSW	Asia	Eu, Af, NA	141
Xylosandrus crassiusculus	Motchulsky 1866	Coleoptera	Curculionidae	Asian ambrosia beetle	Polyphagous, Acacia, Pinus	3	2011	Qld	1	1	Qld, NSW	Asia	Eu, Af, NA, SA	142
Amylostereum areolatum	(Chaillet ex Fr.) Boidin	Ascomycota	Russulales	Sirex fungus	Pinus	1	1951	Tas	3	1	Qld, NSW, Vic, Tas, SA	Eurasia	NZ, Eu, Af, NA, SA, As	143
Antrodia sinuosa	(Fr. : Fr.) P. Karst.	Basidiomycota	Polyporales	brown rot	Timber	3	1995	unknown	2	1		unknown	NZ, Eu, Af, NA, As	144
Apiognomonia errabunda	(Roberge ex Desm.) Höhn	Ascomycota	Diaporthales	Plane tree leaf scorch	Platanus	2	1909	SA	1	1	NSW, Vic, SA	unknown	Eu, NA, As	145
Apiognomonia hystrix	(Tode : Fr.) Sogonov	Ascomycota	Diaporthales	canker	Acer	1	1986	NSW	1	1	NSW	Europe	Eu, NA, As	146
Apiognomonia veneta	(Sacc. & Speg.) Höhn	Ascomycota	Diaporthales	Plane tree anthracnose	Platanus	1	1913	SA	1	1	NSW, Vic, Tas, SA	Asia	NZ, Eu, Af, NA, As	147
Appendiculella kiraiensis	(W. Yamam.) Hansf.	Ascomycota	Meliolales	dark mildew	Cinnamomum	3	1931	NSW	1	0	Qld, NSW, Vic	unknown		148
Armatella litseae	(Henn.) Theiss. & Syd.	Ascomycota	Meliolales	dark mildew	Cinnamomum	2	1935	NSW	1	0	Qld, NSW	Asia		149
Asterina pemphidioides	??	Ascomycota	Capnodiales	leaf spot	Syzygium	2	1931	NSW	1	1	NSW	unknown	Af, As	150
Austropuccinia psidii	(G. Winter) Beenken	Basidiomycota	Pucciniales	Myrtle rust	Myrtaceae: Angophora, Corymbia, Eucalyptus, Syncarpia, Syzygium	2	2010	NSW	3	1	Qld, NSW, Vic, Tas, NT	S.America	NZ, Af, NA, SA, As	151
Botryosphaeria dothidea	(Moug. : Fr.) Ces. & De Not.	Ascomycota	Botryosphaeriales	canker, dieback	Polyphagous: Acacia, Cinnamomum, Eucalyptus, Platanus	3	1900	Vic	2	1	Qld, NSW, Vic, WA	unknown	NZ, Eu, Af, NA, SA, As	152
Calonectria kyotensis	Terash.	Ascomycota	Hypocreales	canker	Polyphagous: Eucalyptus, Khaya,	3	1967	Qld	1	0	Qld, NSW, NT	unknown	NZ, Eu, NA, SA, As	153
Calonectria morganii	Crous, Alfenas & M.J. Wingf	Ascomycota	Hypocreales	leaf spot	Polyphagous: Acacia, Eucalyptus	3	1969	NSW	1	0	NSW, Tas, SA	unknown	NA, SA, As	154
Chaetomium globosum	Kunze: Fr.	Ascomycota	Sordariales	leaf spot/dieback	Eucalyptus, Paulownia	3	1960	NSW	1	0	Qld, NSW, Vic, WA	unknown	NZ, Eu, Af, NA, SA, As	155
Chondrostereum purpureum	(Pers. : Fr.) Pouzar	Basidiomycota	Stereales	white rot	Timber	3	1925	SA	2	1	Qld, NSW, Vic, Tas, SA, WA	unknown	NZ, Eu, NA, As	156
Chrysoporthe deuterocubensis	Gryzenh. & M.J. Wingf.	Ascomycota	Diaporthales	Eucalyptus canker	Eucalyptus	2	1987	WA	1	1	Qld, WA	unknown	Af, As	157
Cladosporium oxysporum	Berk. & M.A. Curtis	Ascomycota	Mycosphaerellales	leaf spot	Polyphagous	3	1907	Vic	1	0	Qld, NSW, Vic, WA, NT	unknown	Eu, Af, NA, SA, As	158
Coleosporium plumeriae	Pat.	Basidiomycota	Uredinales	Frangipani rust	Plumeria	1	1992	Qld	2	1	Qld, NSW, WA, NT	Asia, North America	Af, NA, SA, As	159
Colletotrichum salicis	(Fuckel) Damm, P.F. Cannon & Crous	Ascomycota	not assigned	Willow black canker	Salix	2	2005	NSW	1	1	NSW, Vic, Tas	Asia	NZ, Eu, NA, As	160
Coniophora arida	(Fr. : Fr.) P. Karst.	Basidiomycota	Boletales	brown rot	Timber	3	unknown	unknown	2	1		unknown	Eu, Af, NA, As	161
Coniophora betulae	P. Karst.	Basidiomycota	Boletales	brown rot	Timber	3	unknown	unknown	2	1		unknown	Eu, NA, As	162
Coniophora olivacea	(Pers. : Fr.) P. Karst.	Basidiomycota	Boletales	brown rot	Timber	3	unknown	unknown	2	1		unknown	NZ, Eu, NA, As	163
Coniophora puteana	(Schumach. : Fr.) P.Karst.	Basidiomycota	Boletales	brown rot	Timber	3	unknown	unknown	1	1		unknown	Eu, Af, NA, As	164
Corynelia tropica	(Auersw. & Rabenh.) Starback	Ascomycota	Coryneliales	leaf spot	Podocarpus	1	1934	Qld	1	1	Qld, NSW, Vic	unknown	NZ, SA, As	165
Cryptosphaeria ligniota	(Fr. : Fr.) Auersw.	Ascomycota	Xylariales	canker	Quercus	1	1976	Vic	1	1	Vic	unknown	Eu, NA, SA	166
Cyclaneusma minus	(Butin) DiCosmo, Peredo & Minter	Ascomycota	Rhytismatales	Cycleneusma needle cast	Pinus	1	1959	NSW	3	1	NSW, Vic, Tas, SA	Asia, N.America, Europe	NZ, Eu, Af, NA, SA, As	167
Cyclaneusma niveum	(Pers. : Fr.) DiCosmo, Peredo & Minter	Ascomycota	Rhytismatales	Cycleneusma needle cast	Pinus	1	1959	NSW	1	1	Qld, NSW, Vic, Tas, SA	Asia, N.America, Europe	NZ, Eu, Af, NA, SA, As	168
Cylindrosporella microsperma	(Peck) Petr.	Ascomycota	Diaporthales	leaf spot	Betula	1	1993	NSW	1	1	NSW	unknown	NA, As	169
Cytospora chrysosperma	(Pers. : Fr.) Fr.	Ascomycota	Diaporthales	canker	Populus, Salix	3	1916	Vic	1	0	NSW, Vic, SA	unknown	NZ, Eu, Af, NA, SA, As	170
Cytospora populina	(Pers.) Rabenh.	Ascomycota	Xylariales	Cryptosphaeria canker	Populus	1	1976	Vic	1	1	Vic	unknown	Eu, NA, SA, As	171
Dicarpella dryina	Belisario & M.E. Barr	Ascomycota	Diaporthales	leaf spot	Quercus	1	1982	NSW	1	1	NSW	Europe	NZ, Eu	172
Diplodia africana	Damn & Crous	Ascomycota	Botryosphaeriales	diplodia canker	Pinus	2	2010	Vic	1	1	Vic	Africa	Eu, Af	173
Diplodia alatafructa	Mehl & Slippers	Ascomycota	Dothideales	canker	Acacia	2	2017	Qld	1	0	Qld	unknown	Eu, Af	174
Diplodia mutila	(Fr. : Fr.) Mont.	Ascomycota	Botryosphaeriales	canker, dieback	Araucaria, Brachychiton, Fraxinus	3	1912	Vic	1	1	NSW, Vic, SA, WA	unknown	NZ, Eu, NA, As	175
Diplodia scrobiculata	J. de Wet, Slippers & M.J. Wingf.	Ascomycota	Dothideales		Pinus	2	2018	Qld	2	1	Qld, NSW	unknown	Eu, Af, NA	176
Diplodia sapinea	(Fr.) Dyko & B. Sutton	Ascomycota	Botryosphaeriales	Diplodia canker	Pinus, Cedrus	2	1912	Qld	3	1	Qld, NSW, Vic, Tas, SA, WA	Europe	NZ, Eu, Af, NA, SA, As	177
Diplodia seriata	De Not.	Ascomycota	Dothideales	canker, dieback	Agathis, Araucaria, Elaeocarpus, Schinus	3	1897	Vic	1	0	Qld, NSW, Vic, SA, WA	unknown	Eu, Af, NA, SA, As	178
Discochora pini	(Sivan.) Bissett & M.E. Palm	Ascomycota	Botryosphaeriales	needle blight	Pinus	1	1991	NSW	1	1	NSW	Asia	Af, As	179
Discosia strobilina	Lib.	Ascomycota	Xylariales	leaf spot	Acer	3	1987	NSW	1	0	NSW	unknown	Eu, NA, As	180
Dothistroma septosporum	(Dorog.) Morelet	Ascomycota	Capnodiales	Dothistroma needle blight	Pinus	1	1974	NSW	3	1	Qld, NSW, Vic, Tas	unknown	NZ, Eu, Af, NA, SA, As	181
Drepanopeziza populi-albae	(Klebahn) Nannfeldt	Ascomycota	Helotiales	Marssonina leaf spot & blight	Populus	1	1984	NSW	1	1	NSW, Vic, SA	unknown	NZ, Eu, NA	182
Drepanopeziza punctiformis	Gremmen	Ascomycota	Helotiales	Marssonina leaf spot & blight	Populus	1	1987	NSW	1	1	NSW	N.America	NZ, Eu, NA, As	183
Drepanopeziza sphaerioides	(Pers.) Höhn.	Ascomycota	Helotiales	Willow anthracnose	Salix	1	1931	SA	1	1	Vic, Tas, SA	Europe	NZ, Eu, NA, SA	184
Epicoccum nigrum	Link	Ascomycota	Pleosporales	leaf spot	Polyphagous	3	1908	Qld	1	0	Qld, NSW, Vic, WA	unknown	NZ, Eu, Af, NA, SA, As	185
Erysiphe alphitoides	(Griffon & Maublanc) U. Braun & S. Takamatsu	Ascomycota	Erysiphales	Oak mildew	Quercus	3	1957	Qld	1	1	Qld, Vic	unknown	NZ, Eu, As	186
Erysiphe platani	(Howe) U. Braun & S. Takam.	Ascomycota	Erysiphales	Platanus powdery mildew	Platanus	1	1977	Vic	1	1	NSW, Vic, WA	N.America	NZ, Eu, Af, NA, SA, As	187
Eutypa lata	(Pers. : Fr.) Tul. & C. Tul.	Ascomycota	Xylariales	Eutypa canker	Platanus, Populus, Quercus, Schinus	3	1953	SA	1	0	NSW, Vic, Tas, SA, WA	unknown	NZ, Eu, Af, NA, As	188
Fusicladium scribnerianum	(Cavara) M.B. Ellis	Ascomycota	Pleosporales	leaf spot	Betula	1	1987	NSW	1	1	NSW, Vic	unknown	Eu, SA, As	189
Ganoderma applanatum	(Pers.) Pat.	Basidiomycota	Polyporales	Artist's bracket	Acacia, Allacasuarina, Araucaria, Casuarina, Eucalyptus, Pinus,	3	1898	SA	2	1	Qld, NSW, Vic, Tas, SA, WA	unknown	NZ, Eu, Af, NA, SA, As	190
Gliocladiopsis tenuis	(Bugnic.) Crous & M.J. Wingf.	Ascomycota	Hypocreales	leaf spot	Elaeocarpus	3	1978	Qld	1	0	Qld	unknown	Eu, SA, As	191
Grosmannia huntii	(Robinson-Jeffrey) Zipfel, Z.W. de Beer & M.J. Wingfield	Ascomycota	Ophiostomatales	blue stain	Pinus	1	1998	Vic	1	1	Qld, Vic	unknown	NZ, NA, As	192
Huntiella moniliformis	(Hedgc.) Moreau	Ascomycota	Microascales	blue stain	Nothofagus	3	1985	Tas	1	0	Tas	unknown	Eu, Af, NA, SA, As	193
Kretzschmaria deusta	(Hoffm.) P.M.D. Martin	Ascomycota	Xylariales	heart rot	Quercus	3	1969	NSW	2	1	Qld, NSW	unknown	Eu, NA, SA	194
Lasiodiplodia pseudotheobromae	A.J.L. Phillips, A. Alves & Crous	Ascomycota	Dothideales	canker	Polyphagous	3	2007	Qld	2	0	Qld, NSW, WA	unknown	Eu, Af, NA, SA, As	195
Lasiodiplodia theobromae	(Pat.) Griffon & Maubl.	Ascomycota	Dothideales	Canker, dieback	Polyphagous	3	1933	Qld	2	0	Qld, NSW, SA, WA, NT	unknown	NZ, Eu, Af, NA, SA, As	196
Lepteutypa cupressi	(Nattrass, C. Booth & B. Sutton) H.J. Swart	Ascomycota	Xylariales	Cypress canker	Cupressus, Sequoia, Juniperus, Thuja	1	1949	NSW	3	1	Qld, NSW, Vic, Tas	Africa	NZ, NA, As	197
Leptosphaerulina trifolii	(Rostr.) Petr.	Ascomycota	Pleosporales	leaf spot	Acacia, Populus	3	1939	Vic	1	0	Qld, NSW, Vic, Tas, SA, WA	unknown	NZ, Eu, Af, NA, SA, As	198
Lophodermium australe	Dearness	Ascomycota	Rhytismatales	Lophodermium needle cast	Pinus	1	1983	Qld	1	1	Qld, NSW	unknown	Af, NA, As	199
Lophodermium conigenum	(Brunaud) Hilitzer	Ascomycota	Rhytismatales	Lophodermium needle cast	Pinus	1	2001	Vic	1	1	NSW, Vic	unknown	NZ, Eu, NA, As	200
Lophodermium juniperinum	(Fr.) de Not.	Ascomycota	Rhytismatales	Lophodermium needle cast	Juniperus	1	1959	NSW	1	1	NSW, Vic	unknown	Eu, NA, As	201
Lophodermium pinastri	(Schrad. ex Fr.) Chev	Ascomycota	Rhytismatales	Pine needle split	Pinus	1	1900	Vic	1	1	NSW, Vic, Tas, SA	unknown	NZ, Eu, NA, As	202
Lophodermium pini-excelsae	Ahmad	Ascomycota	Rhytismatales	Lophodermium needle cast	Pinus	1	1988	Vic	1	1	Vic	Asia	Eu, NA, As	203
Macrophomina phaseolina	(Tassi) Goid	Ascomycota	Botryosphaeriales	Charcoal rot	Polyphagous, Eucalyptus, Pinus	3	1903	Vic	1	0	Qld, NSW, Vic, SA, WA, NT	unknown	NZ, Eu, Af, NA, SA, As	204
Marssonina salicis	(Trail) Magnus	Ascomycota	Helotiales	leaf spot	Salix	1	1933	NSW	1	1	NSW, Vic	unknown	Eu, NA	205
Melampsora coleosporioides	Dietel	Basidiomycota	Pucciniales	Willow rust	Salix	1	1978	NSW	1	1	Qld, NSW, Vic, Tas, SA, WA	unknown	NZ, Af, SA, As	206
Melampsora epitea	Thum.	Basidiomycota	Pucciniales	Willow rust	Salix	2	1972	NSW	1	1	NSW, Vic	unknown	NZ, Eu, NA, SA, As	207
Melampsora laricis-populina	Kleb.	Basidiomycota	Pucciniales	Poplar rust	Populus	2	1972	NSW	3	1	Qld, NSW, Vic, Tas, SA, WA, NT	Europe	NZ, Eu, Af, NA, SA, As	208
Melampsora medusae	Thum.	Basidiomycota	Pucciniales	Poplar rust	Populus	2	1972	NSW	3	1	Qld, NSW, Vic, SA	N.America	NZ, Eu, NA, SA, As	209
Melampsoridium betulinum	Kleb.	Basidiomycota	Pucciniales	Birch rust	Betula	1	1948	NSW	1	1	NSW, Vic, Tas, SA, WA	unknown	NZ, Eu, NA, As	210
Meloderma desmazieri	(Duby) Darker	Ascomycota	Rhytismatales	needle cast	Pinus	1	1947	NSW	1	1	NSW	unknown	NZ, Eu, NA, SA, As	211
Microstroma album	(Desm.) Sacc.	Basidiomycota	Microstromatales	leaf spot	Quercus	1	1962	NSW	1	1	NSW, Tas	unknown	NZ, Eu, Af, NA, As	212
Neofusicoccum luteum	(Pennycook & Samuels) Crous, Slippers & A.J.L. Phillips	Ascomycota	Dothideales	canker	Polyphagous, Pinus, Salix, Sequoia	3	1971	Qld	1	0	Qld, NSW, Vic	unknown	NZ, Eu, Af, NA, SA	213
Neofusicoccum parvum	(Pennycook & Samuels) Crous, Slippers & A.J.L. Phillips	Ascomycota	Dothideales	canker	Polyphagous	3	1974	Qld	2	0	Qld, NSW, Vic, SA, WA	unknown	NZ, Eu, Af, NA, SA, As	214
Neofusicoccum vitifusiforme	(Van Niekerk & Crous) Crous, Slippers & A.J.L. Phillips	Ascomycota	Dothideales	leaf spots, cankers	Eucalyptus	3	2005	WA	1	0	Vic, WA	unknown	Eu, Af, NA	215
Neonectria coccinea sensu lato	(Pers. : Fr.) Rossman & Samuels	Ascomycota	Hypocreales	canker	Acer	2	1958	NSW	1	0	NSW	unknown	Eu, Af, NA, As	216
Nothophaeocryptopus gaeumannii	(T. Rohde) Videira, C. Nakash., U. Braun, Crous;	Ascomycota	Pleosporales	Swiss needle cast	Pseudotsuga	1	1974	Vic	1	1	NSW, Vic, Tas	N.America	NZ, Eu, NA, SA	217
Olivea tectonae	(T.S. Ramakr. & K. Ramakr.) R.L. Mulder	Basidiomycota	Pucciniales	Teak leaf rust	Tectona	1	2006	NT	1	1	Qld, WA, NT	unknown	SA, As	218
Ophiognomonia intermedia	(Rehm) Sogonov	Ascomycota	Diaporthales	anthracnose	Betula	1	1962	NSW	1	1	NSW	unknown	Eu, NA	219
Ophiostoma angusticollis	(E.F. Wright & H.D. Griffin) M. Villarreal	Ascomycota	Ophiostomatales	blue stain	Pinus	1	2017	NSW	1	1	NSW	N.America		220
Ophiostoma ips	(Rumbold) Nannf.,	Ascomycota	Ophiostomatales	blue stain	Pinus	1	1943	SA	3	1	Qld, NSW, Vic, SA, WA	N.America	Eu, Af, NA, As	221
Ophiostoma pallidulum	Linnakoski, Z.W. de Beer & M.J. Wingf.	Ascomycota	Ophiostomatales	blue stain	Pinus	1	2016	NSW	1	1	NSW	Europe		222
Ophiostoma piceae	(Münch) Syd. & P. Syd.	Ascomycota	Ophiostomatales	blue stain	Nothofagus	2	1985	Tas	1	1	Tas	unknown	NZ, Eu, NA, SA, As	223
Ophiostoma piliferum	(Fr. : Fr.) Syd. & P. Syd.	Ascomycota	Ophiostomatales	blue stain	Nothofagus	3	1985	Tas	1	1	Tas	unknown	NZ, Eu, NA, SA, As	224
Phaeolus schweinitzii	(Fr. :Fr) Pat.	Basidiomycota	Polyporales	Brown cubicle rot	Pinus	2	1990	Vic	1	1	Vic	unknown	Eu, Af, NA, As	225
Phlebiopsis gigantea	(Fr. : Fr.) Jülich	Basidiomycota	Polyporales	white rot	Timber	3	unknown	unknown	1	1		unknown	Eu, NA, As	226
Phloeospora ulmi	(Fr.) Wallr.	Ascomycota	Capnodiales	leaf spot	Ulmus	1	1962	NSW	1	1	NSW, Vic	unknown	NZ, Eu, NA, As	227
Phytophthora cactorum	(Lebert & Cohn) J. Schröt.	Oomycota	Peronosporales	Root rot	Polyphagous, Betula, Sequioa	3	1957	Vic	1	0	Qld, NSW, Vic, Tas, SA, WA	unknown	NZ, Eu, Af, NA, SA, As	228
Phytophthora cambivora	(Petri) Buisman	Oomycota	Peronosporales	Root rot	Polyphagous, Betula, Eucalyptus	3	1977	NSW	1	0	Qld, NSW, Vic, SA, WA	unknown	NZ, Eu, Af, NA, SA, As	229
Phytophthora cinnamomi	Rands	Oomycota	Peronosporales	Root rot	Polyphagous	3	1930	unknown	3	1	Qld, NSW, Vic, Tas, SA, WA, NT	Asia	NZ, Eu, Af, NA, SA, As	230
Phytophthora multivora	P.M. Scott & T. Jung	Oomycota	Peronosporales	dieback	Polyphagous, Eucalyptus	3	1979	WA	2	1	NSW, Vic, Tas, WA	unknown	Eu, Af, NA, As	231
Phytophthora nicotianae	Breda de Haan	Oomycota	Peronosporales	dieback	Polyphagous	3	1945	NSW	1	0	Qld, NSW, Vic, Tas, SA, WA	unknown	NZ, Eu, Af, NA, SA, As	232
Phytophthora niederhauserii	Z.G. Abad et J.A. Abad	Oomycota	Peronosporales	dieback	Polyphagous	3	2002	Vic	1	1	NSW, Vic, Tas, SA, NT	unknown	Eu, Af, NA, As	233
Pleonectria cucurbitula	(Tode) Hirooka, Rossman & P. Chaverri	Ascomycota	Hypocreales	canker	Pinus	1	1994	Vic	1	1	Vic	unknown	Eu, NA, As	234
Postia placenta	(Fr.) M.J. Larsen & Lombard	Basidiomycota	Polyporales	brown rot	Timber	3	unknown	unknown	2	1		unknown	Af, NA	235
Postia sericeomollis	(Romell) Jülich	Basidiomycota	Polyporales	brown rot	Timber	2	unknown	unknown	2	1		unknown	Eu, NA, As	236
Pseudocercospora catappae	(Henn.) X.J. Liu & Y.L. Guo	Ascomycota	Mycosphaerellales	Leaf spot	Terminalia	1	1993	Qld	1	1	Qld, NT	unknown	SA, As	237
Pseudocercospora myrticola	(Speg.) Deighton	Ascomycota	Mycosphaerellales	leaf spot	Syzygium	2	1994	Qld	1	1	Qld	unknown	NZ, Eu, Af, NA, SA, As	238
Pseudocercospora salicina	(Ellis & Everh.) Deighton	Ascomycota	Mycosphaerellales	leaf spot	Salix	1	1967	NSW	1	1	Qld, NSW	unknown	NA, As	239
Ralstonia solanacearum	(Smith) Yabuuchi et al.	Proteobacteria	Burkholderiales	Bacterial wilt	Polyphagous, Eucalytpus	3	1933	Qld	1	0	Qld, NSW, Vic, SA, WA, NT	unknown	NZ, Eu, Af, NA, SA, As	240
Rugonectria castaneicola	(W. Yamam. & Oyasu) Hirooka & P. Chaverri	Ascomycota	Hypocreales	Rugonectria canker	Quercus	3	2015	NSW	1	0		Asia	NZ, As	241
Sawadaea bicornis	(Wallr. : Fr.) Miyabe	Ascomycota	Erysiphales	Powdery mildew	Acer	2	1992	NSW	1	1	NSW, Vic, WA	Europe	NZ, Eu, NA, SA, As	242
Sawadaea polyfida	(C.T. Wei) R.Y. Zheng & G.Q. Chen	Ascomycota	Erysiphales	Powdery mildew	Acer	1	1993	NSW	1	1	NSW, Vic	Asia		243
Schizoparme straminea	Shear	Ascomycota	Diaporthales		Terminalia	3	1973	Qld	1	0	Qld, NSW, Vic, NT	unknown	Af, NA	244
Serpula lacrymans	(Wulfen : Fr.) J. Schröt.	Basidiomycota	Boletales	dry rot	Timber	3		unknown	3	1	Qld, NSW, Vic	unknown	NZ, Eu, Af, NA, SA, As	245
Sphaceloma murrayae	Grods. & Jenkins	Ascomycota	Myriangiales	Grey scab	Salix	1	1974	NSW	1	1	NSW	unknown	NZ, Eu, NA, As	246
Sphaceloma populi	(Sacc.) Jenkins	Ascomycota	Myriangiales	anthracnose	Populus	1	1941	Vic	1	1	NSW, Vic, Tas	unknown	NZ, Eu, SA, As	247
Sphaerulina betulae	(Pass.) Quaedvlieg, Verkley & Crous	Ascomycota	Capnodiales	leaf spot	Betula	1	1955	NSW	1	1	Qld, NSW	unknown	Eu, As	248
Strasseria geniculata	(Berk. & Broome) Höhn.	Ascomycota		needle blight	Pinus	2	1989	Tas	1	1	Tas	unknown	NZ, Eu, NA, SA	249
Sydowia polyspora	(Bref. & Tavel) E. Müll.	Ascomycota	Dothideales	needle blight	Pinus	2	1932	NSW	1	1	Qld, NSW, Vic	unknown	NZ, Eu, Af, NA	250
Taphrina betulae	(Fuckel) Johanson	Ascomycota	Taphrinales	leaf gall	Betula	1	1972	NSW	1	1	NSW	Europe	Eu, As	251
Taphrina populina	Fr.	Ascomycota	Taphrinales	Poplar leaf curl	Populus	1	1901	SA	1	1	NSW, Vic, Tas, SA, WA	unknown	NZ, Eu, Af, NA, As	252
Taphrina rhizophora	Johanson	Ascomycota	Taphrinales	leaf gall	Populus	1	1974	NSW	1	1	NSW	unknown	Eu, Af, NA, SA, As	253
Tapinella panuoides	(Batsch : Fr.) E.J.Gilbert	Basidiomycota	Boletales	brown rot	Timber	3	unknown	unknown	2	1		N.America	Eu, NA, As	254
Thyronectria pinicola	(Kirschst.) Jaklitsch & Voglmayr	Ascomycota	Hypocreales	canker	Pinus	1	2012	NSW	1	1	NSW, Vic	unknown	Eu, NA, As	255
Trichaptum byssogenum	(Jungh.) Ryvarden	Basidiomycota	Polyporales	white rot	Timber	3	unknown	unknown	1	1		unknown	Af, NA, As	256
Valsa nivea	(Hoffm.) Fr.,	Ascomycota	Diaporthales	canker	Populus	2	1960	NSW	1	0	NSW	unknown	Eu, Af, NA, As	257
Verticillium dahliae	Kleb.	Ascomycota	Hypocreales	dieback/wilt	Acer, Fraxinus, Melaleuca, Harpullia,	3	1930	SA	1	0	Qld, NSW, Vic, Tas, SA, WA	unknown	NZ, Eu, Af, NA, SA, As	258
Xanthomonas axonopodis pv. unnamed		Proteobacteria	Xanthomonadales	Mahogany angular leaf spot	Khaya	1	2009	NT	1	1	NT	unknown		259
Conchaspis angraeci	Cockerell 1893	Hemiptera	Conchaspidae	angraecum scale	Plumeria	3	2002	Qld	1	0	Qld, WA, NT	N.America	NZ, Eu, NA, SA	260
	*differs in GBIF	Eucalypt leaf spot fungi that had been detected and described outside Australia and later found in Australia were excluded as these are likely endemic species (Burgess and Wingfield 2016). Of the >30 non-native Phytophthora species recorded from Australia (Burgess et al. 2017), only those recognised as forest, plantation or amenity tree pathogens were included (T. Burgess, pers. comm.).											#where native range was unknown it was assumed to be one of the regions where present
